# Supplementary material for: Temperature-dependent changes in the host-seeking behaviors of parasitic nematodes
Source: PubMed Central journal article supplement (PMC4858831; doi:10.1186/s12915-016-0259-0), 2016-05-06
Supplement: 12915_2016_259_MOESM1_ESM.pdf [file 12915_2016_259_MOESM1_ESM.pdf]

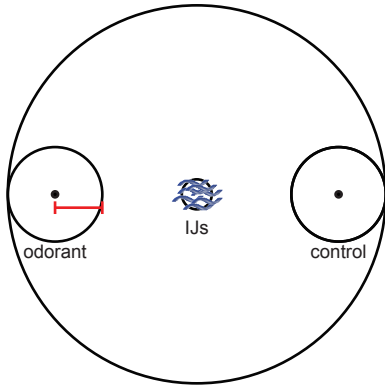

$$\text{chemotaxis index} = \frac{(\# \text{ of IJs at odorant}) - (\# \text{ of IJs at control})}{(\# \text{ of IJs at odorant}) + (\# \text{ of IJs at control})}$$
