# Supplementary material for: Temperature-dependent changes in the host-seeking behaviors of parasitic nematodes
Source: PubMed Central journal article supplement (PMC4858831; doi:10.1186/s12915-016-0259-0), 2016-05-06

**A** CO<sub>2</sub> is attractive for *Ste. carpocapsae* across concentrations

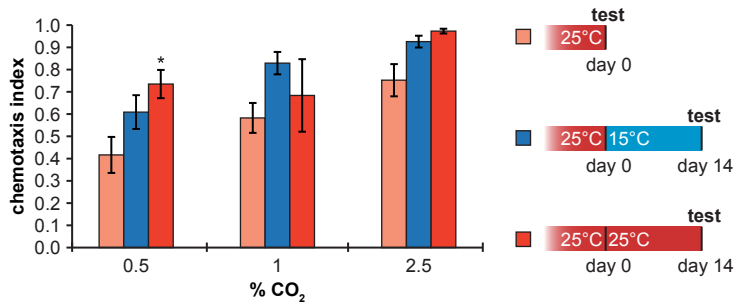

**B** Odorant preferences are consistent across concentrations

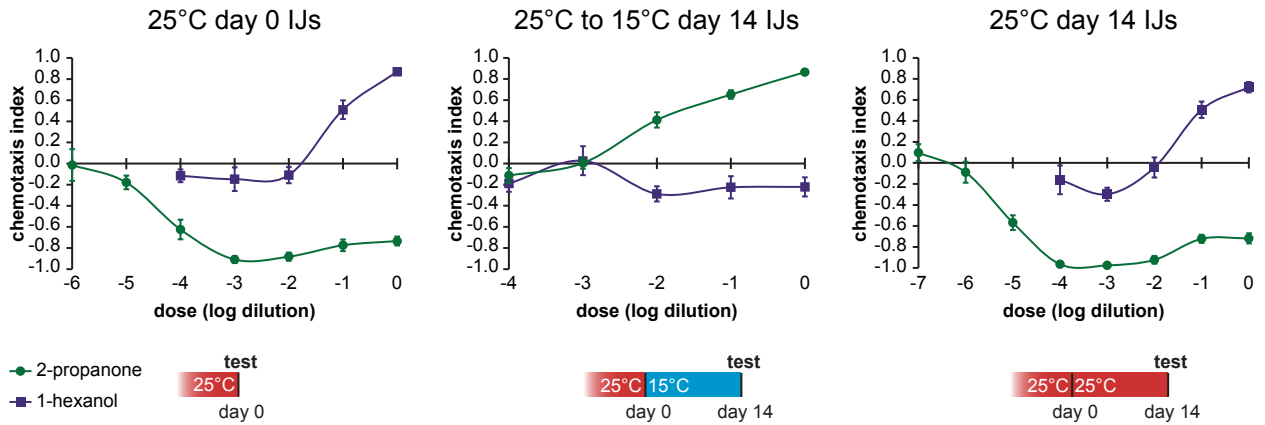

**C** Olfactory plasticity occurs with odor blends

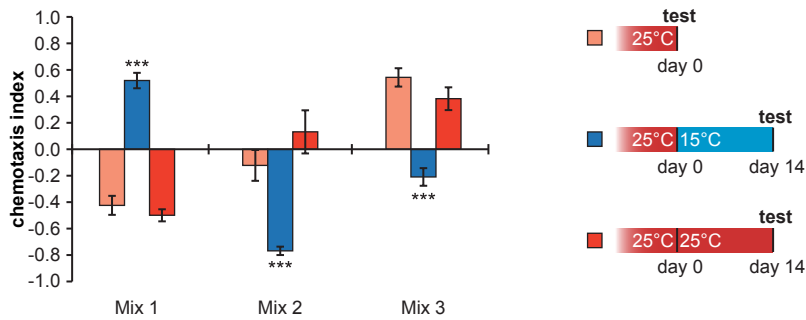

Supplement: 12915_2016_259_MOESM3_ESM.pdf [file 12915_2016_259_MOESM3_ESM.pdf]
