# Supplementary material for: Temperature-dependent changes in the host-seeking behaviors of parasitic nematodes
Source: PubMed Central journal article supplement (PMC4858831; doi:10.1186/s12915-016-0259-0), 2016-05-06

**A** *Ste. carpocapsae*

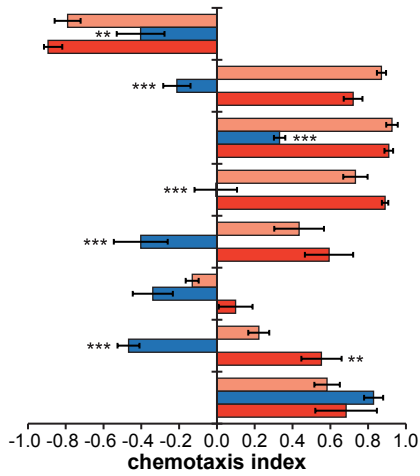

**B** *H. bacteriophora*

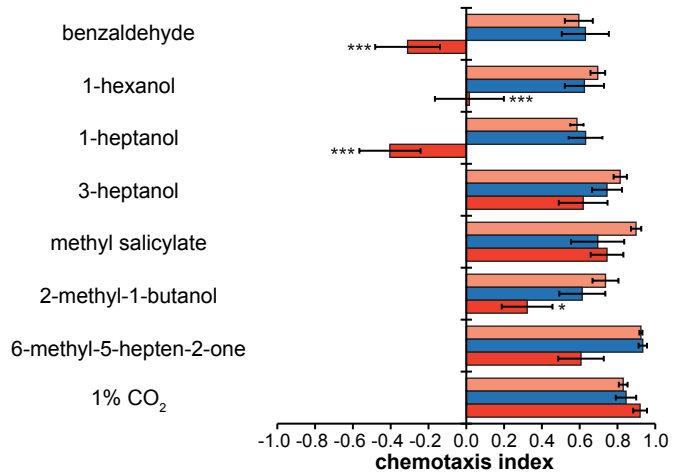

**C** *Ste. scapterisci*

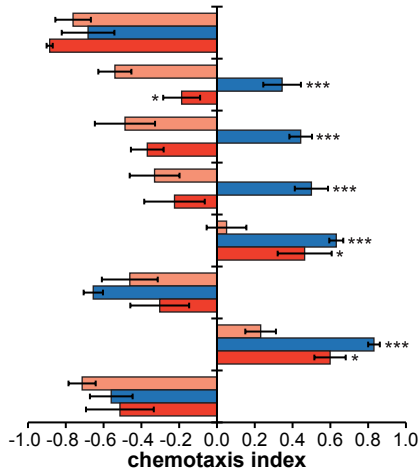

**D** *Ste. riobrave*

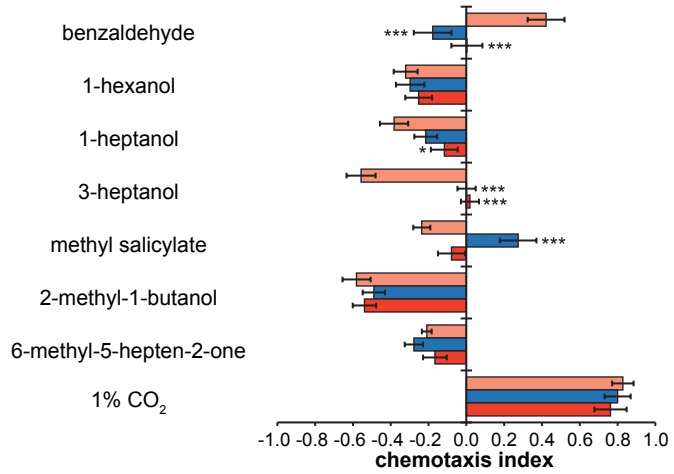

**E** *H. indica*

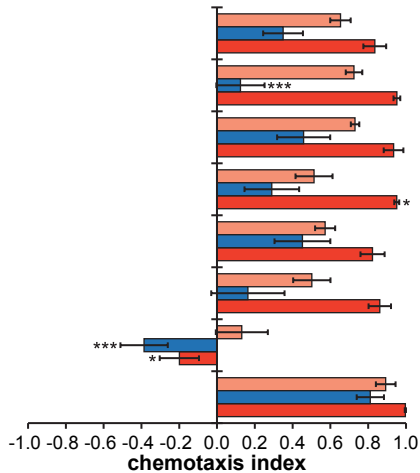

**F** *Ste. feltiae*

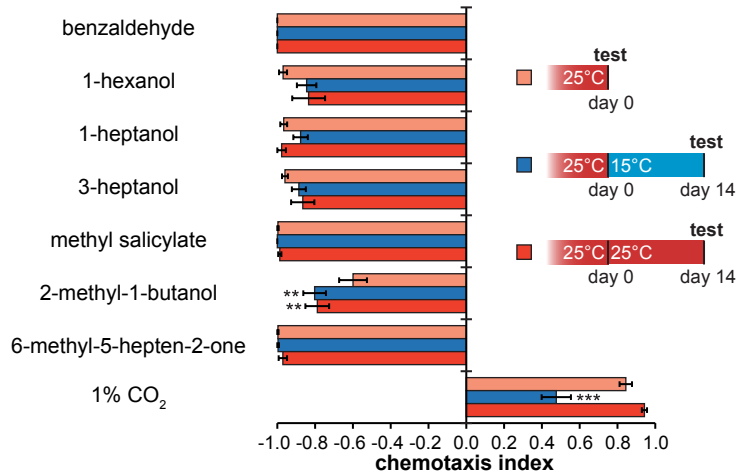

Supplement: 12915_2016_259_MOESM6_ESM.pdf [file 12915_2016_259_MOESM6_ESM.pdf]
